# Supplementary material
Source: PubMed Central journal article supplement (PMC4404406)

## Supplementary Online Content

Fishman I, Keown CL, Lincoln AJ, Pineda JA, Müller R-A. Atypical cross talk between mentalizing and mirror neuron networks in autism spectrum disorder. *JAMA Psychol*. Published online April 16, 2014. doi: 10.1001/jamapsychiatry.2014.83.

**eAppendix 1.** Methods.

**eAppendix 2.** Results.

**eTable 1.** List of psychoactive medications in ASD cohort.

**eTable 2.** Regions Showing Functional Connectivity with the MNS within ASD and TD groups.

**eTable 3.** Regions Showing Functional Connectivity with the ToM within ASD and TD groups.

**eTable 4.** Participant characteristics for a subsample of 15 ASD participants with ADOS-CS and 15 matched TD controls.

**eTable 5.** Regions Exhibiting Group Differences (ASD vs. TD) in Functional Connectivity with M1.

**eFigure.** Within-group functional connectivity maps for the MNS (top panel) and ToM (bottom panel) seeds from the subset of 15 ASD participants with ADOS-CS  $\geq 10$  and 15 TD participants.

This supplementary material has been provided by the authors to give readers additional information about their work.



## **eAppendix 1. Methods.**

### *Participants*

Ten participants with ASD were reported to be taking the following psychoactive medications: Adderall; Xanax; Concerta, Zoloft; Celexa; Risperdal, fluoxetine; Concerta, Zoloft, Risperdal; Adderall, fluoxetine; Daytrana, Provigil, Zoloft, Risperdal; Buspar, Risperdal; Concerta, Lexapro (see also eTable 1).

Nineteen out of 25 participants with ASD were administered Module 3 of the ADOS, while 6/25 participants were administered Module 4.

The racial/ethnic composition of the sample was as following: in the ASD group there were seventeen Caucasian, six Hispanic/Latino, and two Asian participants; in the TD group there were seventeen Caucasian, five Hispanic/Latino, and three Asian participants.

## **eAppendix 2. Results.**

### *Specificity of the increased ToM-MNS cross-talk finding.*

To test the specificity of the finding that atypical ToM-MNS connectivity is associated with more severe social impairment, supplementary analyses were performed to examine whether between-network connectivity with an unrelated, non-social network is also related to ASD social symptoms. Seeds in primary motor cortex (right and left M1), a key area of the motor control, were selected to identify the motor network. FC analysis was conducted in an identical manner to that described in the main manuscript: namely, the average signal across the time series was extracted from the right and left M1 seeds (created as 6 mm radius spheres) and was used to calculate whole-brain correlations. Direct group comparisons (corrected  $p < .05$ ) revealed several significant clusters of overconnectivity in ASD, including greater connectivity (ASD > TD) of right M1 with bilateral IFG, ACC, and PC/PCC, and of left M1 with ACC (see Table S4), in line with recent reports (e.g., Uddin et al., 2013). A mean motor network connectivity score was calculated by averaging  $z$  scores for all significantly overconnected clusters; in addition, mean ToM-motor and MNS-motor between-network connectivity indices were computed by averaging  $z$  scores for all between-network ROI pairs, respectively. While significant correlation was detected between the mean motor connectivity and ADI-social ( $r = .47, p < .023$ , uncorrected), there were no correlations between ToM-motor, or MNS-motor connectivity and ADOS-CS, ADI-Social or ADI-Communication scores ( $r_s = .08 - .15$ , all  $p_s > .5$ ). In other words, connectivity between motor and other, social networks was not associated with ASD symptoms (while the atypical within-network connectivity was). This supplemental analysis suggests that the relationship between abnormal ToM-MNS cross-talk and greater social impairment does not generalize to other between-network patterns of connectivity, but rather provides support to the notion that social dysfunction in ASD is specifically associated with inadequate segregation between two social networks.

**eTable 1. List of psychoactive medications in ASD cohort**

| Participants | Medication class:       |                             |                                   |                                |
|--------------|-------------------------|-----------------------------|-----------------------------------|--------------------------------|
|              | Stimulants <sup>1</sup> | Antipsychotics <sup>2</sup> | SSRI/Antidepressants <sup>3</sup> | Anxiolytics/Other <sup>4</sup> |
| 1            | +                       |                             |                                   |                                |
| 2            |                         |                             |                                   | +                              |
| 3            | +                       |                             | +                                 |                                |
| 4            |                         |                             | +                                 |                                |
| 5            |                         | +                           | +                                 |                                |
| 6            | +                       | +                           | +                                 |                                |
| 7            | +                       |                             | +                                 |                                |
| 8            | +                       | +                           | +                                 | +                              |
| 9            |                         | +                           |                                   | +                              |
| 10           | +                       |                             | +                                 |                                |

Medications in the current sample:

<sup>1</sup>Adderall, Concerta, Daytrana; <sup>2</sup>Risperdal; <sup>3</sup>Celexa, Zoloft, Fluoxetine, Lexapro; <sup>4</sup>Buspar, Xanax, Provigil.

**eTable 2. Regions Showing Functional Connectivity with the MNS within ASD and TD groups**

| ASD (n = 25)                                |                |               |            | TD (n = 25)                                 |                |               |            |
|---------------------------------------------|----------------|---------------|------------|---------------------------------------------|----------------|---------------|------------|
| Peak Location                               | Vol ( $\mu$ l) | Peak <i>t</i> | x y z      | Peak Location                               | Vol ( $\mu$ l) | Peak <i>t</i> | x y z      |
| Additional regions<br>[% volume of cluster] |                |               |            | Additional regions<br>[% volume of cluster] |                |               |            |
| <b>laIPS seed:</b>                          |                |               |            |                                             |                |               |            |
| <b>L Inf. Par. Lobule</b> [26]              | 37368          | 21.76         | -38 -44 44 | <b>L PostCent. Gyrus</b> [26]               | 108756         | 20.76         | -40 -44 42 |
| L PostCent. Gyrus [19]                      |                |               |            | L Inf. Par. Lobule [11]                     |                |               |            |
| L Sup. Par. Lobule [18]                     |                |               |            | L Sup. Par. Lobule [11]                     |                |               |            |
| L PreCent. Gyrus [15]                       |                |               |            | R PostCent. Gyrus [8]                       |                |               |            |
| L SupraMarginal Gyrus [8]                   |                |               |            | R Sup. Par. Lobule [8]                      |                |               |            |
| <b>R Sup. Par. Lobule</b> [25]              | 24192          | 11.29         | 38 -38 40  | <b>R PreCent. Gyrus</b> [25]                | 9936           | 11.25         | 56 2 30    |
| R PostCent. Gyrus [21]                      |                |               |            | R IFG, p. Op [24]                           |                |               |            |
| R Inf. Par. Lobule [15]                     |                |               |            | R IFG, p. Tri [24]                          |                |               |            |
| R SupraMarginal Gyrus [13]                  |                |               |            | R Mid. Front. Gyrus [23]                    |                |               |            |
| R PreCent. Gyrus [9]                        |                |               |            |                                             |                |               |            |
| <b>L Inf. Temp. Gyrus</b> [49]              | 4941           | 9.05          | -50 -56 -6 | <b>L Inf. Temp. Gyrus</b> [28]              | 9342           | 10.77         | -44 -64 -4 |
| L Mid. Temp. Gyrus [21]                     |                |               |            | L Fusiform Gyrus [17]                       |                |               |            |
| L Inf. Occ. Gyrus [20]                      |                |               |            | L Inf. Occ. Gyrus [17]                      |                |               |            |
| L Fusiform Gyrus [5]                        |                |               |            | L Mid. Occ. Gyrus [13]                      |                |               |            |
|                                             |                |               |            | L Mid. Temp. Gyrus [7]                      |                |               |            |
| <b>L Med. Front. Gyrus</b> [46]             | 3780           | 8.02          | -4 -16 50  | <b>R Inf. Temp. Gyrus</b> [47]              | 9234           | 10.33         | 46 -58 -6  |
| L Mid. Cing. Gyrus [27]                     |                |               |            | R Mid. Temp. Gyrus [18]                     |                |               |            |
| R Med. Front. Gyrus [14]                    |                |               |            | R Fusiform Gyrus [9]                        |                |               |            |
| R Mid. Cing. Gyrus [10]                     |                |               |            |                                             |                |               |            |
| <b>R IFG, p. Op</b> [64]                    | 2106           | 8.84          | 44 2 26    | <b>L PreCent. Gyrus</b> [64]                | 4401           | 10.52         | -50 4 38   |
| R PreCent. Gyrus [34]                       |                |               |            | L IFG, p. Op [29]                           |                |               |            |
|                                             |                |               |            | L Mid. Front. Gyrus [7]                     |                |               |            |
| <b>L PreCent. Gyrus</b> [77]                | 1053           | 8.12          | -44 2 30   | <b>R Putamen</b> [38]                       | 4320           | 9.37          | 14 8 8     |
| L IFG, p. Op [16]                           |                |               |            | R Caudate [20]                              |                |               |            |
| L PostCent. Gyrus [6]                       |                |               |            | R Pallidum [17]                             |                |               |            |
| <b>R Inf. Temp. Gyrus</b> [98]              | 756            | 7.50          | 50 -46 -10 | <b>L IFG, p. Tri</b> [61]                   | 4158           | 9.54          | -40 16 30  |
|                                             |                |               |            | L Mid. Front. Gyrus [36]                    |                |               |            |
|                                             |                |               |            | <b>L Putamen</b> [55]                       | 4023           | 9.30          | -14 14 6   |
|                                             |                |               |            | L Caudate [16]                              |                |               |            |
|                                             |                |               |            | L Pallidum [11]                             |                |               |            |
| <b>raIPS seed:</b>                          |                |               |            |                                             |                |               |            |
| <b>R Sup. Par. Lobule</b> [24]              | 34749          | 19.91         | 38 -44 44  | <b>R PostCent. Gyrus</b> [19]               | 65367          | 21.93         | 44 -44 48  |
| R PostCent. Gyrus [19]                      |                |               |            | R Sup. Par. Lobule [14]                     |                |               |            |
| R SupraMarginal Gyrus [16]                  |                |               |            | R SupraMarginal Gyrus [10]                  |                |               |            |
| R Inf. Par. Lobule [16]                     |                |               |            | R Inf. Par. Lobule [9]                      |                |               |            |
| R Precuneus [10]                            |                |               |            | R PreCent. Gyrus [8]                        |                |               |            |
| <b>L Inf. Par. Lobule</b> [40]              | 23976          | 11.56         | -14 -62 56 | <b>L PostCent. Gyrus</b> [24]               | 43200          | 13.36         | -40 -44 42 |



|                                 |       |       |            |                                  |        |       |            |
|---------------------------------|-------|-------|------------|----------------------------------|--------|-------|------------|
| <b>L Mid. Temp. Gyrus</b> [99]  | 4482  | 8.75  | -58 -38 2  | <b>L Inf. Par. Lobule</b> [37]   | 21546  | 11.83 | -34 -64 38 |
|                                 |       |       |            | L Angular Gyrus [26]             |        |       |            |
|                                 |       |       |            | L Mid. Temp. Gyrus [11]          |        |       |            |
|                                 |       |       |            | L Mid. Occ. Gyrus [8]            |        |       |            |
| <b>L Caudate</b> [55]           | 3996  | 12.99 | -8 8 14    | <b>R Caudate</b> [33]            | 7911   | 12.55 | 14 4 14    |
| L Pallidum [15]                 |       |       |            | R Putamen [32]                   |        |       |            |
| L Putamen [15]                  |       |       |            | R Pallidum [9]                   |        |       |            |
| <b>R Mid. Temp. Gyrus</b> [99]  | 972   | 7.89  | 64 -34 -4  | <b>L Mid. Temp. Gyrus</b> [70]   | 7263   | 9.81  | -56 -40 0  |
|                                 |       |       |            | L Inf. Temp. Gyrus [26]          |        |       |            |
| <b>R Mid. Front. Gyrus</b> [50] | 837   | 7.35  | 22 50 26   | <b>R Angular Gyrus</b> [90]      | 1431   | 8.04  | 44 -62 36  |
| R Sup. Front. Gyrus [50]        |       |       |            |                                  |        |       |            |
|                                 |       |       |            | <b>R Mid. Temp. Gyrus</b> [68]   | 1161   | 7.04  | 56 -52 8   |
|                                 |       |       |            | R Sup. Temp. Gyrus [31]          |        |       |            |
|                                 |       |       |            | <b>R Inf. Par. Lobule</b> [91]   | 702    | 7.09  | 44 -46 36  |
|                                 |       |       |            | R SupraMarginal Gyrus [9]        |        |       |            |
| <b><u>rPMC seed:</u></b>        |       |       |            |                                  |        |       |            |
| <b>R Mid. Front. Gyrus</b> [44] | 23868 | 21.53 | 40 4 38    | <b>R Mid. Frontal Gyrus</b> [14] | 116343 | 27.45 | 44 4 38    |
| R IFG, p. Tri [19]              |       |       |            | L Mid. Front. Gyrus [8]          |        |       |            |
| R IFG, p. Op [15]               |       |       |            | R Sup. Front. Gyrus [7]          |        |       |            |
| R PreCent. Gyrus [13]           |       |       |            | R IFG, p. Tri [6]                |        |       |            |
| <b>L PreCent. Gyrus</b> [31]    | 9045  | 10.03 | -44 10 32  | <b>R Mid. Temp. Gyrus</b> [51]   | 18360  | 9.47  | 58 -50 6   |
| L IFG, p. Tri [29]              |       |       |            | R Angular Gyrus [21]             |        |       |            |
| L Mid. Front. Gyrus [24]        |       |       |            | R Inf. Par. Lobule [14]          |        |       |            |
| L IFG, p. Op [15]               |       |       |            |                                  |        |       |            |
| <b>R Inf. Par. Lobule</b> [36]  | 8181  | 9.53  | 52 -46 42  | <b>R Precuneus</b> [45]          | 11637  | 11.15 | 4 -52 38   |
| R Angular Gyrus [29]            |       |       |            | L Precuneus [31]                 |        |       |            |
| R Mid. Occ. Gyrus [16]          |       |       |            | R Mid. Cing. Gyrus [13]          |        |       |            |
| R SupraMarginal Gyrus [9]       |       |       |            | L Mid. Cing. Gyrus [9]           |        |       |            |
| <b>L Inf. Par. Lobule</b> [78]  | 6939  | 8.56  | -38 -50 36 | <b>L Inf. Par. Lobule</b> [65]   | 6831   | 8.72  | -50 -50 44 |
| L Angular Gyrus [29]            |       |       |            | L SupraMarginal Gyrus [11]       |        |       |            |
|                                 |       |       |            | L Sup. Par. Lobule [6]           |        |       |            |
| <b>L Sup. Med. Gyrus</b> [34]   | 6750  | 8.83  | 2 20 50    | <b>L Mid. Temp. Gyrus</b> [83]   | 1593   | 7.88  | -52 -52 20 |
| R Sup. Med. Gyrus [20]          |       |       |            | L Sup. Temp. Gyrus [12]          |        |       |            |
| R Mid. Cing. Gyrus [15]         |       |       |            |                                  |        |       |            |
| L Mid. Cing. Gyrus [13]         |       |       |            |                                  |        |       |            |
| <b>R Mid. Front. Gyrus</b> [42] | 3618  | 7.73  | 28 56 12   | <b>L Mid. Front. Gyrus</b> [99]  | 1404   | 6.98  | -28 52 20  |
| R IFG, p. Orb [27]              |       |       |            |                                  |        |       |            |
| R IFG, p. Tri [14]              |       |       |            |                                  |        |       |            |
| R Sup. Front. Gyrus [9]         |       |       |            |                                  |        |       |            |
| <b>L IFG, p. Tri</b> [59]       | 2970  | 8.83  | -44 40 2   | <b>L Mid. Temp. Gyrus</b> [91]   | 1269   | 7.54  | -56 -34 0  |
| L Mid. Front. Gyrus [19]        |       |       |            | L Inf. Temp. Gyrus [6]           |        |       |            |
| L IFG, p. Opb [17]              |       |       |            |                                  |        |       |            |
| <b>R Mid. Temp. Gyrus</b> [68]  | 1539  | 7.57  | 56 -44 -6  | <b>L IFG, p. Orb</b> [83]        | 837    | 7.33  | -38 44 -4  |
| R Inf. Temp. Gyrus [32]         |       |       |            | L Mid. Orb. Gyrus [14]           |        |       |            |
| <b>R Caudate</b> [69]           | 1323  | 8.20  | 14 4 14    |                                  |        |       |            |

|                                 |       |       |             |                                 |       |       |            |
|---------------------------------|-------|-------|-------------|---------------------------------|-------|-------|------------|
| <b>L Putamen</b> [61]           | 783   | 7.43  | -16 -2 6    |                                 |       |       |            |
| L Pallidum [38]                 |       |       |             |                                 |       |       |            |
| <b><u>lpSTS seed:</u></b>       |       |       |             |                                 |       |       |            |
| <b>L Mid. Temp. Gyrus</b> [64]  | 20115 | 14.78 | -44 -58 8   | <b>L Mid. Temp. Gyrus</b> [18]  | 72009 | 18.49 | -50 -56 12 |
| L Mid. Occ. Gyrus [9]           |       |       |             | L Sup. Temp. Gyrus [8]          |       |       |            |
| L SupraMarginal Gyrus [8]       |       |       |             | L Mid. Occ. Gyrus [7]           |       |       |            |
| <b>R Mid. Temp. Gyrus</b> [77]  | 9423  | 11.09 | 58 -50 12   | <b>L Precuneus</b> [18]         | 37125 | 12.01 | -4 -55 48  |
| R Sup. Temp. Gyrus [16]         |       |       |             | L PostCent. Gyrus [15]          |       |       |            |
|                                 |       |       |             | L PreCent. Gyrus [12]           |       |       |            |
|                                 |       |       |             | L Med. Front. Gyrus [11]        |       |       |            |
|                                 |       |       |             | R Med. Front. Gyrus [9]         |       |       |            |
|                                 |       |       |             | R Precuneus [9]                 |       |       |            |
| <b>L Putamen</b> [31]           | 7587  | 8.94  | 4 -28 8     | <b>R Mid. Temp. Gyrus</b> [36]  | 29781 | 11.74 | 58 -52 8   |
| L Thalamus [16]                 |       |       |             | R Sup. Temp. Gyrus [19]         |       |       |            |
| L Caudate [7]                   |       |       |             | R Putamen [14]                  |       |       |            |
| <b>R IFG, p. Tri</b> [50]       | 4428  | 9.12  | 50 34 2     | <b>L Putamen</b> [39]           | 10746 | 9.95  | -28 -14 2  |
| R IFG, p. Orb [29]              |       |       |             | L Caudate [10]                  |       |       |            |
| R IFG, p. Op [20]               |       |       |             | L Insula [10]                   |       |       |            |
| <b>L IFG, p. Tri</b> [44]       | 3448  | 7.91  | -50 16 20   | <b>R PreCent. Gyrus</b> [58]    | 3510  | 8.41  | 50 -16 30  |
| L IFG, p. Op [28]               |       |       |             | R PostCent. Gyrus [34]          |       |       |            |
| L IFG, p. Orb [11]              |       |       |             |                                 |       |       |            |
| <b>L Precuneus</b> [76]         | 2187  | 8.47  | -2 -56 48   | <b>R PreCent. Gyrus</b> [43]    | 2079  | 8.07  | 46 -2 38   |
| R Precuneus [23]                |       |       |             | R IFG, p. Op [24]               |       |       |            |
|                                 |       |       |             | R Mid. Front. Gyrus [18]        |       |       |            |
|                                 |       |       |             | R IFG, p. Tri [15]              |       |       |            |
| <b>L Med. Front. Gyrus</b> [63] | 2187  | 8.13  | -2 -2 66    | <b>L IFG, p. Tri</b> [22]       | 2052  | 8.50  | -46 14 8   |
| R Med. Front. Gyrus [33]        |       |       |             | L Temp. Pole [18]               |       |       |            |
|                                 |       |       |             | L Sup. Temp. Gyrus [15]         |       |       |            |
|                                 |       |       |             | L Inf. Front. Gyrus [13]        |       |       |            |
|                                 |       |       |             | L IFG, p. Op [8]                |       |       |            |
| <b>R Sup. Temp. Gyrus</b> [45]  | 1674  | 8.01  | 58 -16 6    | <b>L PreCent. Gyrus</b> [44]    | 1998  | 8.27  | -46 10 36  |
| R Mid. Temp. Gyrus [36]         |       |       |             | L Mid. Front. Gyrus [31]        |       |       |            |
| R Med. Temp. Pole [18]          |       |       |             | L IFG, p. Op [17]               |       |       |            |
| <b>L Fusiform Gyrus</b> [37]    | 1647  | 7.47  | -32 -50 -22 | <b>R PostCent. Gyrus</b> [88]   | 1620  | 7.25  | 28 -38 54  |
| L Inf. Temp. Gyrus [29]         |       |       |             | R Sup. Par. Lobule [9]          |       |       |            |
| L Inf. Occ. Gyrus [27]          |       |       |             |                                 |       |       |            |
| <b>L IFG, p. Orb</b> [89]       | 1350  | 9.23  | -32 32 -6   | <b>R Mid. Front. Gyrus</b> [95] | 1323  | 11.85 | 28 22 44   |
| <b>R Putamen</b> [78]           | 1215  | 7.20  | 26 2 8      | <b>R PreCent. Gyrus</b> [97]    | 1134  | 7.81  | 26 -26 62  |
| R Pallidum [13]                 |       |       |             |                                 |       |       |            |
| <b>L Ant. Cing. Cortex</b> [46] | 1107  | 9.35  | -2 8 38     | <b>L Mid. Front. Gyrus</b> [99] | 621   | 7.05  | -26 46 20  |
| L Mid. Cing. Cortex [32]        |       |       |             |                                 |       |       |            |
| R Mid. Cing. Cortex [12]        |       |       |             |                                 |       |       |            |
| <b>L PreCent. Gyrus</b> [60]    | 1053  | 8.45  | -40 -2 50   |                                 |       |       |            |
| L Mid. Front. Gyrus [37]        |       |       |             |                                 |       |       |            |



|                                 |       |       |            |                                 |       |       |            |
|---------------------------------|-------|-------|------------|---------------------------------|-------|-------|------------|
| <b>L Mid. Cing. Cortex</b> [87] | 810   | 7.42  | 2 -26 42   |                                 |       |       |            |
| R Mid. Cing. Cortex [11]        |       |       |            |                                 |       |       |            |
| <b>L IFG, p. Tri</b> [99]       | 756   | 6.89  | -50 26 14  |                                 |       |       |            |
| <b>R Precuneus</b> [48]         | 648   | 7.02  | 8 -58 60   |                                 |       |       |            |
| L Precuneus [41]                |       |       |            |                                 |       |       |            |
| <b><u>rpSTS seed:</u></b>       |       |       |            |                                 |       |       |            |
| <b>R Mid. Temp. Gyrus</b> [63]  | 16605 | 28.17 | 50 -56 12  | <b>R Precuneus</b> [20]         | 40743 | 13.52 | 4 -46 44   |
| R Mid. Occ. Gyrus [15]          |       |       |            | L Precuneus [15]                |       |       |            |
| R Sup. Temp. Gyrus [11]         |       |       |            | R Mid. Cing. Gyrus [10]         |       |       |            |
|                                 |       |       |            | L Mid. Cing. Gyrus [9]          |       |       |            |
| <b>L Mid. Temp. Gyrus</b> [47]  | 11205 | 13.75 | -34 -80 30 | <b>R Mid. Temp. Gyrus</b> [62]  | 22599 | 23.59 | 46 -56 8   |
| L Mid. Occ. Gyrus [42]          |       |       |            | R Sup. Temp. Gyrus [14]         |       |       |            |
|                                 |       |       |            | R Mid. Occ. Gyrus [9]           |       |       |            |
| <b>L Precuneus</b> [28]         | 3807  | 8.04  | 2 -56 2    | <b>L Mid. Temp. Gyrus</b> [57]  | 15471 | 12.16 | -50 -62 12 |
| R Precuneus [15]                |       |       |            | L Mid. Occ. Gyrus [24]          |       |       |            |
| R Calcarine Gyrus [14]          |       |       |            | L SupraMarginal Gyrus [6]       |       |       |            |
| <b>R Mid. Front. Gyrus</b> [62] | 1809  | 8.44  | 40 2 48    | <b>R IFG, p. Tri</b> [36]       | 9936  | 10.88 | 50 28 0    |
| R PreCent. Gyrus [34]           |       |       |            | R PreCent. Gyrus [24]           |       |       |            |
|                                 |       |       |            | R Mid. Front. Gyrus [13]        |       |       |            |
|                                 |       |       |            | R IFG, p. Op [12]               |       |       |            |
|                                 |       |       |            | R IFG, p. Orb [11]              |       |       |            |
| <b>R IFG, p. Tri</b> [56]       | 1296  | 8.44  | 56 16 20   | <b>R Med. Front. Gyrus</b> [43] | 4212  | 10.12 | 8 16 60    |
| R IFG, p. Op [42]               |       |       |            | R Sup. Med. Gyrus [17]          |       |       |            |
|                                 |       |       |            | L Med. Frontal Gyrus [16]       |       |       |            |
|                                 |       |       |            | L Sup. Med. Gyrus [12]          |       |       |            |
| <b>L Precuneus</b> [64]         | 621   | 7.42  | 4 -58 44   | <b>R Putamen</b> [49]           | 4104  | 8.39  | 32 -8 2    |
| R Precuneus [21]                |       |       |            | R Pallidum [10]                 |       |       |            |
| L Sup. Par. Lobule [14]         |       |       |            | R Caudate [10]                  |       |       |            |
|                                 |       |       |            | <b>L PreCent. Gyrus</b> [97]    | 1998  | 9.46  | -28 -26 50 |
|                                 |       |       |            | <b>R Mid. Front. Gyrus</b> [67] | 1593  | 8.33  | 26 22 50   |
|                                 |       |       |            | R Sup. Front. Gyrus [32]        |       |       |            |

*Note:* Only clusters with a minimum volume of 600  $\mu$ l are displayed.

MNS = mirror neuron system; laIPS = left anterior intraparietal sulcus; raIPS = right anterior intraparietal sulcus; IPMC = left premotor cortex; rPMC = right premotor cortex; lpSTS = left posterior superior temporal sulcus; rpSTS = right posterior superior temporal sulcus; IFG = Inferior Frontal Gyrus; L = left; R = right; Front. = Frontal; Temp. = Temporal; Par. = Parietal; Occ. = Occipital; Inf. = Inferior; Sup. = Superior; Mid. = Middle; Med. = Median; Ant. = Anterior; Post. = Posterior; Cing. = Cingulate.

**eTable 3. Regions Showing Functional Connectivity with the ToM within ASD and TD groups**

| ASD (n = 25)                                |          |               |            | TD (n = 25)                                 |          |               |            |
|---------------------------------------------|----------|---------------|------------|---------------------------------------------|----------|---------------|------------|
| Peak Location                               | Vol (μl) | Peak <i>t</i> | x y z      | Peak Location                               | Vol (μl) | Peak <i>t</i> | x y z      |
| Additional regions<br>[% volume of cluster] |          |               |            | Additional regions<br>[% volume of cluster] |          |               |            |
| <b><u>lTPJ seed:</u></b>                    |          |               |            |                                             |          |               |            |
| <b>L Sup. Med. Gyrus</b> [25]               | 34830    | 11.74         | -40 14 44  | <b>L Sup. Med. Gyrus</b> [25]               | 53460    | 12.13         | -10 10 56  |
| L Sup. Front. Gyrus [17]                    |          |               |            | L Mid. Front. Gyrus [17]                    |          |               |            |
| L Mid. Front. Gyrus [17]                    |          |               |            | L Sup. Front. Gyrus [15]                    |          |               |            |
| R Sup. Front. Gyrus [11]                    |          |               |            | R Sup. Med. Gyrus [12]                      |          |               |            |
| R Sup. Med. Gyrus [10]                      |          |               |            | R Sup. Front. Gyrus [7]                     |          |               |            |
| R Mid. Front. Gyrus [6]                     |          |               |            | L Ant. Cing. Cortex [6]                     |          |               |            |
| <b>L Angular Gyrus</b> [40]                 | 12960    | 20.14         | -46 -56 24 | <b>L Precuneus</b> [32]                     | 27243    | 10.65         | -2 -58 42  |
| L Mid. Temp. Gyrus [23]                     |          |               |            | R Precuneus [15]                            |          |               |            |
| L Inf. Par. Lobule [8]                      |          |               |            | L Mid. Cing. Gyrus [14]                     |          |               |            |
|                                             |          |               |            | L Post. Cing. Gyrus [8]                     |          |               |            |
| <b>L Angular Gyrus</b> [46]                 | 9774     | 11.23         | 2 -52 2    | <b>L Angular Gyrus</b> [35]                 | 18333    | 21.79         | -50 -56 24 |
| R Precuneus [16]                            |          |               |            | L Mid. Temp. Gyrus [19]                     |          |               |            |
| L Post. Cing. Gyrus [13]                    |          |               |            | L Inf. Par. Lobule [13]                     |          |               |            |
| L Precuneus [8]                             |          |               |            | L SupraMarginal Gyrus [7]                   |          |               |            |
| <b>R Angular Gyrus</b> [58]                 | 9342     | 13.74         | 46 -58 26  | <b>R Mid. Temp. Gyrus</b> [51]              | 15255    | 11.87         | 52 -56 18  |
| R Mid. Temp. Gyrus [25]                     |          |               |            | R Angular Gyrus [26]                        |          |               |            |
| R Inf. Par. Lobule [7]                      |          |               |            | R Sup. Temp. Gyrus [10]                     |          |               |            |
| <b>L Mid. Temp. Gyrus</b> [81]              | 9261     | 10.99         | -52 -4 -16 | <b>L Mid. Temp. Gyrus</b> [87]              | 9747     | 12.49         | -52 -2 -12 |
| L Inf. Temp. Gyrus [12]                     |          |               |            |                                             |          |               |            |
| <b>R Mid. Temp. Gyrus</b> [71]              | 4617     | 8.71          | 64 -28 2   | <b>L Hippocampus</b> [33]                   | 3969     | 8.38          | -26 -2 -10 |
| R Sup. Temp. Gyrus [14]                     |          |               |            | L ParaHipp. Gyrus [30]                      |          |               |            |
| R Inf. Temp. Gyrus [8]                      |          |               |            | L Fusiform Gyrus [16]                       |          |               |            |
| <b>L IFG, p. Orb</b> [61]                   | 2646     | 8.24          | -44 28 4   | <b>L Caudate</b> [81]                       | 2565     | 9.72          | -10 4 14   |
| L IFG, p. Tri [27]                          |          |               |            | L Putamen [9]                               |          |               |            |
| <b>L Putamen</b> [80]                       | 864      | 7.96          | -26 -14 6  | <b>L IFG, p. Tri</b> [46]                   | 2322     | 8.31          | -44 28 -6  |
|                                             |          |               |            | L IFG, p. Orb [45]                          |          |               |            |
| <b>L Caudate</b> [99]                       | 864      | 8.64          | -10 8 14   | <b>L Sup. Temp. Gyrus</b> [98]              | 1053     | 7.63          | -44 -28 12 |
|                                             |          |               |            | <b>R Hippocampus</b> [37]                   | 891      | 7.69          | 28 -20 -12 |
|                                             |          |               |            | R ParaHippocampal Gyrus [35]                |          |               |            |
|                                             |          |               |            | <b>R Mid. Front. Gyrus</b> [95]             | 810      | 7.85          | 44 14 42   |
|                                             |          |               |            | <b>R Caudate</b> [99]                       | 756      | 8.27          | 16 14 12   |
| <b><u>rTPJ seed:</u></b>                    |          |               |            |                                             |          |               |            |
| <b>L Sup. Med. Gyrus</b> [19]               | 36936    | 12.27         | 2 52 30    | <b>L Precuneus</b> [27]                     | 34101    | 10.91         | 8 -44 6    |
| R Sup. Front. Gyrus [18]                    |          |               |            | R Precuneus [23]                            |          |               |            |
| R Sup. Med. Gyrus [17]                      |          |               |            | L Mid. Cing. Gyrus [9]                      |          |               |            |
| R Mid. Front. Gyrus [12]                    |          |               |            | L Post. Cing. Gyrus [7]                     |          |               |            |

|                                |       |       |             |  |                                 |       |       |            |  |
|--------------------------------|-------|-------|-------------|--|---------------------------------|-------|-------|------------|--|
| L Sup. Front. Gyrus [12]       |       |       |             |  | R Mid. Cing. Gyrus [7]          |       |       |            |  |
| L Mid. Front. Gyrus [11]       |       |       |             |  |                                 |       |       |            |  |
| <b>L Precuneus</b> [34]        | 15363 | 14.67 | 8 -58 26    |  | <b>R Mid. Front. Gyrus</b> [24] | 33480 | 12.18 | 40 14 42   |  |
| R Precuneus [24]               |       |       |             |  | R Sup. Front. Gyrus [18]        |       |       |            |  |
| L Post. Cing. Cortex [9]       |       |       |             |  | R Sup. Med. Gyrus [17]          |       |       |            |  |
| R Post. Cing. Cortex [6]       |       |       |             |  | L Sup. Med. Gyrus [15]          |       |       |            |  |
|                                |       |       |             |  | R Ant. Cing. Cortex [8]         |       |       |            |  |
|                                |       |       |             |  | L Ant. Cing. Cortex [6]         |       |       |            |  |
| <b>R Angular Gyrus</b> [51]    | 13878 | 23.08 | 50 - 56 24  |  | <b>R Angular Gyrus</b> [45]     | 16443 | 20.16 | 50 -52 20  |  |
| R Mid. Temp. Gyrus [25]        |       |       |             |  | R Mid. Temp. Gyrus [23]         |       |       |            |  |
| R Sup. Temp. Gyrus [6]         |       |       |             |  | R Inf. Temp. Gyrus [10]         |       |       |            |  |
|                                |       |       |             |  | R Sup. Temp. Gyrus [8]          |       |       |            |  |
| <b>L Angular Gyrus</b> [45]    | 10206 | 14.11 | -46 -58 24  |  | <b>L Angular Gyrus</b> [40]     | 14445 | 16.50 | -46 -56 24 |  |
| L Mid. Temp. Gyrus [22]        |       |       |             |  | L Mid. Temp. Gyrus [20]         |       |       |            |  |
| L Mid. Occ. Gyrus [7]          |       |       |             |  | L Inf. Par. Lobule [13]         |       |       |            |  |
| <b>L Mid. Temp. Gyrus</b> [96] | 2565  | 10.13 | -58 -14 -10 |  | <b>L Mid. Front. Gyrus</b> [71] | 9909  | 10.18 | -20 26 50  |  |
|                                |       |       |             |  | L Sup. Front. Gyrus [19]        |       |       |            |  |
| <b>R Mid. Temp. Gyrus</b> [99] | 2106  | 7.68  | 50 -34 0    |  | <b>L Mid. Temp. Gyrus</b> [99]  | 5454  | 8.33  | -62 -20 -6 |  |
|                                |       |       |             |  | <b>R Mid. Temp. Gyrus</b> [57]  | 3537  | 8.59  | 52 -10 -12 |  |
|                                |       |       |             |  | <b>L Fusiform Gyrus</b> [42]    | 2160  | 9.70  | -22 -28 0  |  |
|                                |       |       |             |  | L Hippocampus [20]              |       |       |            |  |
|                                |       |       |             |  | L ParaHippocampal Gyrus [18]    |       |       |            |  |
|                                |       |       |             |  | <b>R Caudate</b> [73]           | 1458  | 8.19  | 10 -2 26   |  |
|                                |       |       |             |  | <b>R Sup. Front. Gyrus</b> [57] | 1080  | 6.87  | 32 50 12   |  |
|                                |       |       |             |  | R Mid. Front. Gyrus [43]        |       |       |            |  |
| <b>mPFC seed:</b>              |       |       |             |  |                                 |       |       |            |  |
| <b>L Sup. Med. Gyrus</b> [21]  | 61776 | 22.62 | 4 46 24     |  | <b>L Sup. Med. Gyrus</b> [17]   | 87912 | 23.80 | 2 52 26    |  |
| L Sup. Front. Gyrus [15]       |       |       |             |  | L Sup. Front. Gyrus [14]        |       |       |            |  |
| R Sup. Med. Gyrus [14]         |       |       |             |  | R Sup. Med. Gyrus [12]          |       |       |            |  |
| R Sup. Front. Gyrus [13]       |       |       |             |  | L Mid. Front. Gyrus [11]        |       |       |            |  |
| L Mid. Front. Gyrus [11]       |       |       |             |  | R Sup. Front. Gyrus [10]        |       |       |            |  |
|                                |       |       |             |  | L Ant. Cing. Cortex [8]         |       |       |            |  |
|                                |       |       |             |  | R Ant. Cing. Cortex [7]         |       |       |            |  |
| <b>L Precuneus</b> [36]        | 9855  | 10.53 | -4 -50 24   |  | <b>L Precuneus</b> [26]         | 20520 | 13.77 | 2 -22 36   |  |
| R Precuneus [17]               |       |       |             |  | L Mid. Cing. Gyrus [14]         |       |       |            |  |
| L Post. Cing. Cortex [14]      |       |       |             |  | R Precuneus [12]                |       |       |            |  |
| R Post. Cing. Cortex [9]       |       |       |             |  | L Post. Cing. Cortex [10]       |       |       |            |  |
|                                |       |       |             |  | R Mid. Cing. Cortex [10]        |       |       |            |  |
| <b>L Mid. Temp. Gyrus</b> [37] | 7398  | 12.78 | -50 -62 20  |  | <b>L Mid. Temp. Gyrus</b> [34]  | 14742 | 12.86 | -50 20 8   |  |
| L Angular Gyrus [35]           |       |       |             |  | L IFG, p. Orb [24]              |       |       |            |  |
| L SupraMarginal Gyrus [6]      |       |       |             |  | L IFG, p. Tri [16]              |       |       |            |  |
|                                |       |       |             |  | L Med. Temp. Pole [9]           |       |       |            |  |
| <b>L Mid. Temp. Gyrus</b> [82] | 6777  | 9.38  | -58 -10 -10 |  | <b>L Angular Gyrus</b> [56]     | 6885  | 11.43 | -46 -62 26 |  |
| L Med. Temp. Pole [14]         |       |       |             |  | L Mid. Temp. Gyrus [22]         |       |       |            |  |

|                                 |       |       |            |                                 |       |       |            |
|---------------------------------|-------|-------|------------|---------------------------------|-------|-------|------------|
| <b>R Mid. Temp. Gyrus</b> [57]  | 5805  | 13.16 | 46 -52 20  | <b>R Mid. Temp. Gyrus</b> [63]  | 5994  | 10.20 | 52 -8 -12  |
| R Angular Gyrus [27]            |       |       |            | R Med. Temp. Pole [24]          |       |       |            |
| R Sup. Temp. Gyrus [14]         |       |       |            | R Inf. Temp. Gyrus [10]         |       |       |            |
| <b>L IFG, p. Orb</b> [57]       | 4374  | 9.18  | -40 34 -6  | <b>L Caudate</b> [76]           | 4104  | 9.07  | -10 14 12  |
| L IFG, p. Tri [18]              |       |       |            |                                 |       |       |            |
| L Insula [15]                   |       |       |            |                                 |       |       |            |
| <b>R IFG, p. Orb</b> [65]       | 1944  | 9.89  | 38 20 -12  | <b>R IFG, p. Orb</b> [72]       | 1620  | 8.48  | 50 22 6    |
| R Insula [20]                   |       |       |            | R IFG, p. Tri [27]              |       |       |            |
| <b>L Caudate</b> [98]           | 1404  | 8.31  | -14 14 14  | <b>R Angular Gyrus</b> [36]     | 1296  | 7.47  | 52 -62 20  |
|                                 |       |       |            | R Mid.Temp. Gyrus [23]          |       |       |            |
| <b>L Hippocampus</b> [36]       | 621   | 7.01  | -16 -34 0  |                                 |       |       |            |
| L ParaHippocampal Gyrus [23]    |       |       |            |                                 |       |       |            |
| L Lingual Gyrus [11]            |       |       |            |                                 |       |       |            |
| <b>R Lingual Gyrus</b> [34]     | 567   | 8.02  | 16 -26 -4  |                                 |       |       |            |
| R Hippocampus [22]              |       |       |            |                                 |       |       |            |
| R ParaHippocampal Gyrus [15]    |       |       |            |                                 |       |       |            |
| <b><u>PCC seed:</u></b>         |       |       |            |                                 |       |       |            |
| <b>L Precuneus</b> [35]         | 34749 | 24.38 | 2 -56 38   | <b>L Precuneus</b> [21]         | 66231 | 23.17 | 2 -52 38   |
| R Precuneus [28]                |       |       |            | R Precuneus [19]                |       |       |            |
| L Mid. Cing. Gyrus [8]          |       |       |            | L Mid. Cing. Gyrus [7]          |       |       |            |
| R Mid. Cing. Gyrus [7]          |       |       |            | R Mid. Cing. Gyrus [7]          |       |       |            |
| <b>R Mid. Front. Gyrus</b> [80] | 9261  | 11.81 | 34 20 44   | <b>R Mid. Front. Gyrus</b> [31] | 19521 | 15.20 | 46 10 42   |
| R Sup. Front. Gyrus [19]        |       |       |            | L Sup. Med. Gyrus [26]          |       |       |            |
|                                 |       |       |            | R Sup. Front. Gyrus [17]        |       |       |            |
|                                 |       |       |            | R Sup. Med. Gyrus [10]          |       |       |            |
|                                 |       |       |            | L Ant. Cing. Cortex [5]         |       |       |            |
| <b>R Angular Gyrus</b> [50]     | 8073  | 11.65 | 50 -52 36  | <b>L Angular Gyrus</b> [36]     | 16956 | 12.73 | -38 -68 20 |
| R Inf. Par. Lobule [18]         |       |       |            | L Mid. Temp. Gyrus [20]         |       |       |            |
| R Mid. Temp. Gyrus [16]         |       |       |            | L Inf. Par. Lobule [18]         |       |       |            |
| R Sup. Temp. Gyrus [9]          |       |       |            | L Mid. Occ. Gyrus [13]          |       |       |            |
| <b>L Mid. Front. Gyrus</b> [97] | 3996  | 9.38  | -32 22 42  | <b>R Angular Gyrus</b> [44]     | 13878 | 10.09 | 40 -70 36  |
|                                 |       |       |            | R Mid. Temp. Gyrus [35]         |       |       |            |
|                                 |       |       |            | R Inf. Par. Lobule [7]          |       |       |            |
|                                 |       |       |            | R Sup. Temp. Gyrus [6]          |       |       |            |
| <b>L Angular Gyrus</b> [61]     | 2970  | 8.45  | -32 -58 38 | <b>L Mid. Front. Gyrus</b> [69] | 11745 | 11.02 | -46 10 36  |
| L Inf. Par. Lobule [36]         |       |       |            | L Sup. Front. Gyrus [15]        |       |       |            |
| <b>R Ant. Cing. Cortex</b> [42] | 1890  | 8.15  | 2 38 24    | <b>L Mid. Temp. Gyrus</b> [88]  | 2781  | 8.04  | -46 -4 -10 |
| L Sup. Med. Gyrus [23]          |       |       |            | L Sup. Temp. Gyrus [11]         |       |       |            |
| R Sup. Med. Gyrus [15]          |       |       |            |                                 |       |       |            |
| L Ant. Cing. Cortex [13]        |       |       |            |                                 |       |       |            |
| <b>R Sup. Front. Gyrus</b> [60] | 999   | 8.14  | 26 50 14   | <b>R Mid. Temp. Gyrus</b> [94]  | 1836  | 9.23  | 52 -14 -10 |
| R Mid. Front. Gyrus [39]        |       |       |            |                                 |       |       |            |
|                                 |       |       |            | <b>L Mid. Temp. Gyrus</b> [99]  | 1755  | 8.52  | -58 -40 0  |
|                                 |       |       |            | <b>R Caudate</b> [86]           | 945   | 6.77  | 10 10 8    |

**R Mid. Temp. Gyrus [98]**      837    8.46   64   -32   -4

---

*Note:* Only clusters with a minimum volume of 600  $\mu$ l are displayed.

ToM = theory of mind; lTPJ = left temporal-parietal junction; rTPJ = right temporal-parietal junction; mPFC = medial prefrontal cortex; PCC = posterior cingulate cortex/precuneus; IFG = Inferior Frontal Gyrus; L = left; R = right; Front. = Frontal; Temp. = Temporal; Par. = Parietal; Occ. = Occipital; Inf. = Inferior; Sup. = Superior; Mid. = Middle; Med. = Median; Ant. = Anterior; Post. = Posterior; Cing. = Cingulate.

**eTable 4. Participant characteristics for a subsample of 15 ASD participants with ADOS-CS  $\geq$  10 and 15 matched TD controls**

|                          | ASD (n = 15) |           | TD (n = 15) |           | p value |
|--------------------------|--------------|-----------|-------------|-----------|---------|
|                          | M (SD)       | range     | M (SD)      | range     |         |
| Gender (M/F)             | 13/2         |           | 13/2        |           |         |
| Handedness (R/L)         | 12/3         |           | 13/2        |           |         |
| Age (years)              | 14.6 (2.0)   | 11.8-17.7 | 14.5 (1.5)  | 12.4-16.8 | 0.92    |
| Verbal IQ                | 106 (15)     | 83-128    | 107 (10)    | 87-126    | 0.94    |
| Non-verbal IQ            | 108 (18)     | 70-140    | 108 (12)    | 86-129    | 0.90    |
| Full-scale IQ            | 109 (15)     | 81-139    | 108 (11)    | 88-126    | 0.95    |
| ADOS Communication       | 3.6 (1.2)    | 2-6       | n/a         |           | --      |
| Social Interaction       | 9.5 (2.3)    | 6-13      | n/a         |           | --      |
| Repetitive Behavior      | 2.3 (1.6)    | 0-5       | n/a         |           | --      |
| ADI-R Social Interaction | 16.5 (6.2)   | 6-24      | n/a         |           | --      |
| Communication            | 13.3 (6.0)   | 4-25      | n/a         |           | --      |
| Repetitive Behavior      | 6.5 (2.4)    | 3-11      | n/a         |           | --      |
| SRS, Total               | 77.7 (9.8)   | 58-94     | 41.3 (5.5)  | 35-52     | <0.000  |

*Note:* IQ, intelligence quotient; ADOS, Autism Diagnostic Observation Schedule; ADI-R, Autism Diagnostic Interview-Revised; SRS, Social Responsiveness Scale

**eTable 5. Regions Exhibiting Group Differences (ASD vs. TD) in Functional Connectivity with M1**

| Seed         | Peak Location | Talairach coordinates            |     |     | Cluster Volume<br>( $\mu$ l) | T-score |       |
|--------------|---------------|----------------------------------|-----|-----|------------------------------|---------|-------|
|              |               | x                                | y   | z   |                              |         |       |
| <b>Motor</b> | rM1           | R ACC                            | 10  | -46 | 38                           | 1134    | -3.36 |
|              |               | R IFG                            | 16  | 20  | -12                          | 918     | -3.61 |
|              |               | L ACC                            | -4  | 8   | -6                           | 891     | -4.02 |
|              |               | R/L PCC                          | 2   | -50 | 2                            | 783     | -3.72 |
| lM1          |               | L Superior, Middle Frontal Gyrus | -10 | 50  | 0                            | 1755    | -3.75 |
|              |               | R/L ACC                          | 2   | 32  | 6                            | 810     | -3.00 |

*Note:* rM1 = right primary motor cortex (Talairach coordinates: 40 -16 48); lM1 = left primary motor cortex (-38 -16 48); ACC = Anterior Cingulate Cortex; IFG = Inferior Frontal Gyrus; PCC = Posterior Cingulate Cortex; L: left; R: right.

**eFigure. Within-group functional connectivity maps for the MNS (top panel) and ToM (bottom panel) seeds from the subset of 15 ASD participants with ADOS-CS  $\geq$  10 and 15 TD participants.**

Results of the within-group (ASD, TD;  $p < .05$  corrected) analyses obtained in a subsample of 15 ASD participants with ADOS  $\geq$  10 and 15 matched TD participants, for each MNS and ToM seeds (top and bottom panels, respectively) are presented in a conjunction view. Seed ROIs are presented on the axial slices on the left, and are indicated by black circles on the inflated maps.

laIPS = left anterior intraparietal sulcus; raIPS = right anterior intraparietal sulcus; lPMC = left premotor cortex; rPMC = right premotor cortex; lpSTS = left posterior superior temporal sulcus; rpSTS = right posterior superior temporal sulcus; lTPJ = left temporal-parietal junction; rTPJ = right temporal-parietal junction; mPFC = medial prefrontal cortex; PCC = posterior cingulate cortex/precuneus; L: left; R: right.



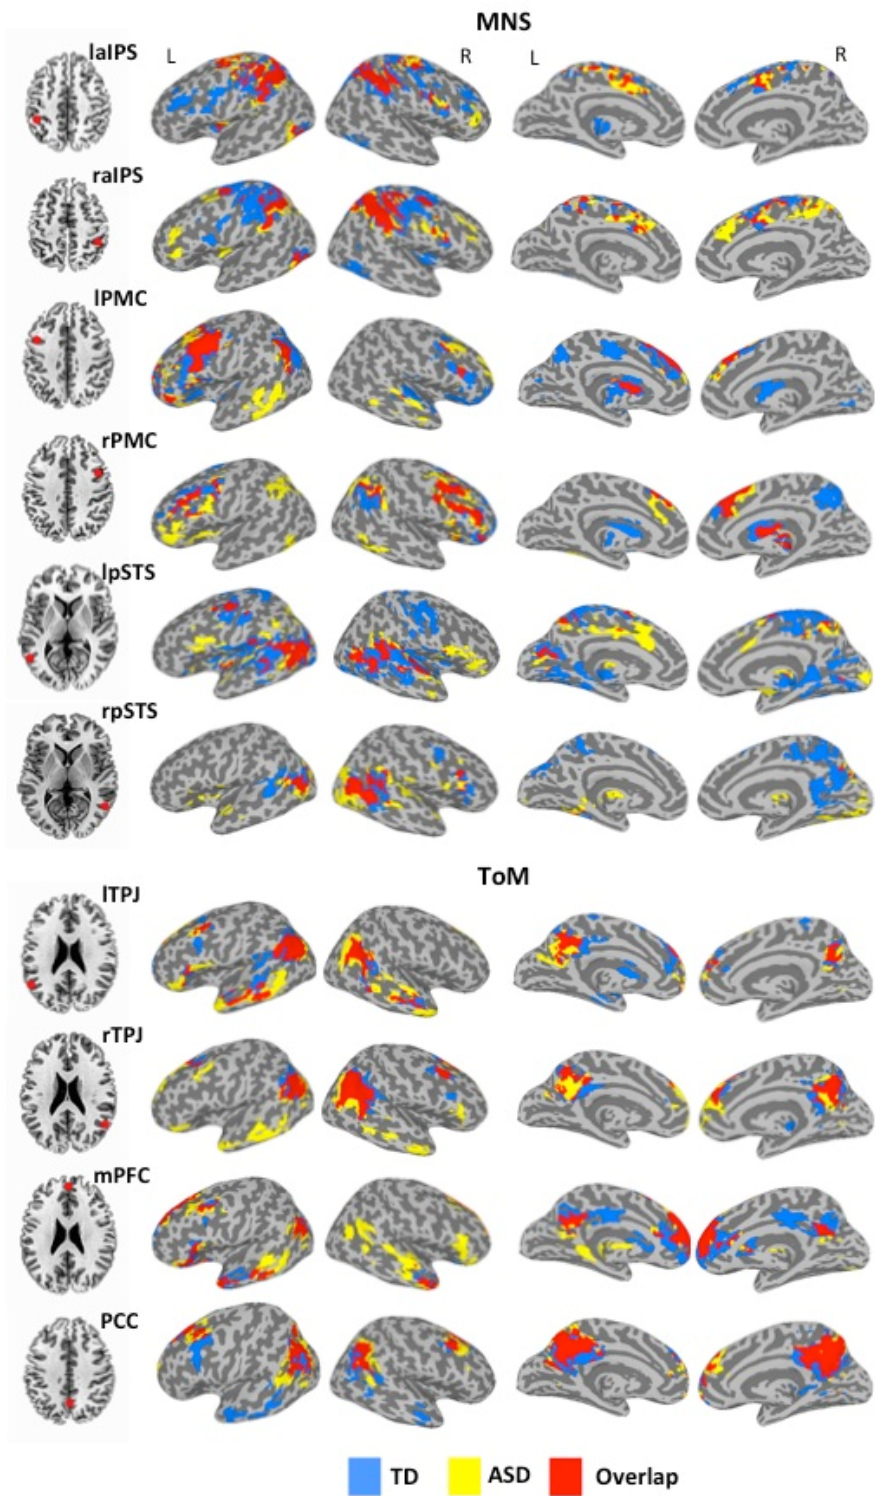

Supplement: NIHMS678747-supplement-Supplement.pdf [file NIHMS678747-supplement-Supplement.pdf]
